# Supplementary material for: Population structures of the water-borne plant pathogen Phytopythium helicoides reveal its possible origins and transmission modes in Japan
Source: PLoS One. 2018 Dec 26;13(12):e0209667. doi: 10.1371/journal.pone.0209667 (PMC6306214; doi:10.1371/journal.pone.0209667)
Supplement: S3 Table — (XLSX) [file pone.0209667.s003.xlsx]

## Sheet: Sheet1
S3 Table. Genetic variation among each locus for each population
Population	n	AGC				CTT1				GCAGAC				GGA1				GGA2				AGGCA
		NA	Ho	He	PHW	NA	Ho	He	PHW	NA	Ho	He	PHW	NA	Ho	He	PHW	NA	Ho	He	PHW	NA	Ho	He	PHW
Aichi	70	13	0.614286	0.695918	0.00*	6	0.828571	0.601939	0.00*	9	0.485714	0.529898	0.00*	10	0.342857	0.498571	0.00*	8	0.477612	0.673201	0.00*	11	0.957143	0.715918	0.00*
Fukui	2	2	1	0.5	1	1	0	0	-	1	0	0	-	1	0	0	-	1	0	0	-	2	1	0.5	1
Gifu	64	15	0.918033	0.703843	0.00*	4	0.941176	0.578047	0.00*	6	0.349206	0.372008	0.0012*	14	0.619048	0.669312	0.00*	5	0.241379	0.316439	0.00*	12	0.803279	0.770357	0
Iriomote Island	8	5	0.875	0.75	0.4721	2	0.25	0.21875	1	2	0.25	0.21875	1	9	1	0.859375	0.677	3	0.5	0.40625	1	4	1	0.695312	0.3564
Kagawa	4	6	0.5	0.8125	0.0272	2	0.5	0.375	1	3	0.25	0.53125	0.1436	7	0.75	0.84375	0.0296	1	0	0	0.3359	4	0.666667	0.666667	0.2009
Rebun Island	1	1	0	0	-	2	1	0.5	-	1	0	0	-	1	0	0	-	1	0	0	-	1	0	0	-
Mie	2	1	0	0	-	0	0	0	-	0	0	0	-	3	0.5	0.625	0.3364	2	1	0.5	1	1	0	0	-
Miyagi	2	3	0.5	0.625	0.3378	2	1	0.5	1	2	0.5	0.375	1	2	0	0.5	0.337	2	1	0.5	0.3276	3	1	0.625	1
Nagano	1	2	1	0.5	-	2	1	0.5	-	2	1	0.5	-	1	0	0	-	1	0	0	-	2	1	0.5	-
Nara	4	5	0.75	0.78125	0.2895	1	0	0	-	4	1	0.6875	0.3171	5	1	0.78125	0.472	2	0.25	0.21875	1	5	1	0.75	0.3113
Netherlands	1	2	1	0.5	-	1	0	0	-	1	0	0	-	2	1	0.5	-	2	1	0.5	-	1	0	0	-
Niigata	1	2	1	0.5	-	1	0	0	-	1	0	0	-	1	0	0	-	1	0	0	-	1	0	0	-
Oita	17	5	1	0.745675	0.00*	2	1	0.5	0.001*	1	0	0	-	3	0.823529	0.641869	0.001*	2	0.0625	0.0605469		4	0.176471	0.610727	0.00*
Saga	2	4	1	0.75	1	1	0	0	-	1	0	0	-	2	0	0.5	-	2	1	0.5	1	2	0	0.5	-
Shizuoka	34	12	0.588235	0.817907	0.00*	6	0.588235	0.560121	0.0258	9	0.441176	0.697232	0.0016*	12	0.5	0.804066	0.00*	8	0.71875	0.788574	0.00*	7	0.911765	0.764706	0.00*
Tochigi	3	3	0.666667	0.666667	0.1974	3	1	0.625	1	2	0	0.444444	0.1961	4	1	0.722222	1	3	0.5	0.625	0.0756	3	1	0.611111	1
Toyama	3	4	0.333333	0.722222	0.4672	0	0	0	-	1	0	0	-	2	1	0.5	0.4003	1	0	0	-	2	0.5	0.375	1
USA	2	2	0	0.5	0.337	0	0	0	-	1	0	0	-	1	0	0	-	1	0	0	-	1	0	0	-
Wakayama	2	3	0.5	0.625	-	1	0	0	-	1	0	0	-	2	0	0.5	-	1	0	0	-	2	0	0.5	1
Yamagata	1	1	0	0	-	2	1	0.5	-	2	1	0.5	-	2	1	0.5	-	1	0	0	-	2	1	0.5	-
Yamanashi	8	7	0.428571	0.704082	0.0095*	5	0.428571	0.469388	0.2866	7	0.714286	0.785714	0.024	7	0.625	0.742188	0.0623	3	0.428571	0.438776	0.3813	6	0.857143	0.693878	0.5725
Total	232	17	0.718062	0.808477	0.00*	10	0.762376	0.591891	0.00*	13	0.377193	0.548996	0.00*	21	0.535088	0.745768	0.00*	13	0.399038	0.752635	0.00*	16	0.8	0.832089	0.00*
n	number of individuals inside the population
NA	number of different alleles
Ho	observed heterozygosity
He	expected heterozygosity
PHW	P-value for hardy weinberg equilibrium, *indicates significant deviation to HWE after Holm-Bonferroni sequential correction
